# Supplementary material
Source: Springer Nature journal article supplement (https://www.springermedizin.de/resource/supplementary/12889_2011_2998_MOESM4_ESM.pdf/9487834)
Supplement: MOESM4 [file 9487834]

|                                                                        | Baseline | 3-month | 6-month | 9-months | 12-months |
|------------------------------------------------------------------------|----------|---------|---------|----------|-----------|
| <b>Stage of Change</b>                                                 |          |         |         |          |           |
| Exercise Stage of Change Short Form <sup>42</sup>                      | x        | x       | x       | x        | x         |
| Weight Loss Stage of Change Short Form <sup>42</sup>                   | x        | x       | x       | x        | x         |
| Readiness to Change Pain Question <sup>43</sup>                        | x        | x       | x       | x        | x         |
| Pain Stage of Change Questionnaire (PSOCQ) <sup>43</sup>               | x        |         | x       |          | x         |
| <b>Psychological Variables</b>                                         |          |         |         |          |           |
| PRIME-MD <sup>44</sup>                                                 | x        |         |         |          |           |
| Breath Holding Task                                                    | x        |         |         |          |           |
| West Haven-Yale Multidimensional Pain Inventory (WHYMPI) <sup>45</sup> | x        | x       | x       | x        | x         |
| Distress Tolerance Scale <sup>46</sup>                                 | x        | x       | x       | x        | x         |
| Numeric Scale of Pain Intensity (NRS-I) <sup>47</sup>                  | x        |         |         |          |           |
| Quality of Life (SF-36) <sup>48</sup>                                  | x        | x       | x       | x        | x         |
| Positive and Negative Affect Schedule (PANAS) <sup>49</sup>            | x        | x       | x       | x        | x         |
| <b>Other Variables</b>                                                 |          |         |         |          |           |
| VHA Patient Satisfaction Survey <sup>50</sup>                          |          |         | x       |          | x         |
| Computer Email Web Literacy (CEW) <sup>51</sup>                        | x        |         |         |          |           |
